# Supplementary material
Source: PubMed Central journal article supplement (PMC11558401)
Supplement: ajtr0016-5228-f11.pdf [file ajtr0016-5228-f11.pdf]

## Thymidylate synthase in human cancers

### Supplementary File 1. The reference list related to TYMS phosphoprotein site in mammals.

- [1] Very N, Hardivillé S, Decourcelle A, Thévenet J, Djouina M, Page A, Vergoten G, Schulz C, Kerr-Conte J, Lefebvre T, Dehennaut V and El Yazidi-Belkoura I. Thymidylate synthase O-GlcNAcylation: a molecular mechanism of 5-FU sensitization in colorectal cancer. *Oncogene* 2022; 41: 745-756.
- [2] Akimov V, Barrio-Hernandez I, Hansen SVF, Hallenborg P, Pedersen AK, Bekker-Jensen DB, Puglia M, Christensen SDK, Vanselow JT, Nielsen MM, Kratchmarova I, Kelstrup CD, Olsen JV and Blagoev B. UbiSite approach for comprehensive mapping of lysine and N-terminal ubiquitination sites. *Nat Struct Mol Biol* 2018; 25: 631-640.
- [3] Lumpkin RJ, Gu H, Zhu Y, Leonard M, Ahmad AS, Clauser KR, Meyer JG, Bennett EJ and Komives EA. Site-specific identification and quantitation of endogenous SUMO modifications under native conditions. *Nat Commun* 2017; 8: 1171.
- [4] Mertins P, Mani DR, Ruggles KV, Gillette MA, Clauser KR, Wang P, Wang X, Qiao JW, Cao S, Petralia F, Kawaler E, Mundt F, Krug K, Tu Z, Lei JT, Gatza ML, Wilkerson M, Perou CM, Yellapantula V, Huang KL, Lin C, McLellan MD, Yan P, Davies SR, Townsend RR, Skates SJ, Wang J, Zhang B, Kinsinger CR, Mesri M, Rodriguez H, Ding L, Paulovich AG, Fenyo D, Ellis MJ and Carr SA; NCI CPTAC. Proteogenomics connects somatic mutations to signalling in breast cancer. *Nature* 2016; 534: 55-62.
- [5] Boeing S, Williamson L, Encheva V, Gori I, Saunders RE, Instrell R, Aygün O, Rodriguez-Martinez M, Weems JC, Kelly GP, Conaway JW, Conaway RC, Stewart A, Howell M, Snijders AP and Svejstrup JQ. Multiomic analysis of the UV-Induced DNA damage response. *Cell Rep* 2016; 15: 1597-1610.
- [6] Hendriks IA, D'Souza RC, Yang B, Verlaan-de Vries M, Mann M and Vertegaal AC. Uncovering global SUMOylation signaling networks in a site-specific manner. *Nat Struct Mol Biol* 2014; 21: 927-36.
- [7] Mertins P, Yang F, Liu T, Mani DR, Petyuk VA, Gillette MA, Clauser KR, Qiao JW, Gritsenko MA, Moore RJ, Levine DA, Townsend R, Erdmann-Gilmore P, Snider JE, Davies SR, Ruggles KV, Fenyo D, Kitchens RT, Li S, Olvera N, Dao F, Rodriguez H, Chan DW, Liebler D, White F, Rodland KD, Mills GB, Smith RD, Paulovich AG, Ellis M and Carr SA. Ischemia in tumors induces early and sustained phosphorylation changes in stress kinase pathways but does not affect global protein levels. *Mol Cell Proteomics* 2014; 13: 1690-704.
- [8] Tammsalu T, Matic I, Jaffray EG, Ibrahim AFM, Tatham MH and Hay RT. Proteome-wide identification of SUMO2 modification sites. *Sci Signal* 2014; 7: rs2.
- [9] Mertins P, Qiao JW, Patel J, Udeshi ND, Clauser KR, Mani DR, Burgess MW, Gillette MA, Jaffe JD and Carr SA. Integrated proteomic analysis of post-translational modifications by serial enrichment. *Nat Methods* 2013; 10: 634-7.
- [10] Udeshi ND, Svinkina T, Mertins P, Kuhn E, Mani DR, Qiao JW and Carr SA. Refined preparation and use of anti-diglycine remnant (K-ε-GG) antibody enables routine quantification of 10,000s of ubiquitination sites in single proteomics experiments. *Mol Cell Proteomics* 2013; 12: 825-31.
- [11] Zhou H, Di Palma S, Preisinger C, Peng M, Polat AN, Heck AJ and Mohammed S. Toward a comprehensive characterization of a human cancer cell phosphoproteome. *J Proteome Res* 2013; 12: 260-71.
- [12] Povlsen LK, Beli P, Wagner SA, Poulsen SL, Sylvestersen KB, Poulsen JW, Nielsen ML, Bekker-Jensen S, Mailand N and Choudhary C. Systems-wide analysis of ubiquitylation dynamics reveals a key role for PAF15 ubiquitylation in DNA-damage bypass. *Nat Cell Biol* 2012; 14: 1089-98.
- [13] Klammer M, Kaminski M, Zedler A, Oppermann F, Blencke S, Marx S, Müller S, Tebbe A, Godl K and Schaab C. Phosphosignature predicts dasatinib response in non-small cell lung cancer. *Mol Cell Proteomics* 2012; 11: 651-68.
- [14] Franz-Wachtel M, Eisler SA, Krug K, Wahl S, Carpy A, Nordheim A, Pfizenmaier K, Hausser A and Macek B. Global detection of protein kinase D-dependent phosphorylation events in nocodazole-treated human cells. *Mol Cell Proteomics* 2012; 11: 160-70.
- [15] Beli P, Lukashchuk N, Wagner SA, Weinert BT, Olsen JV, Baskcomb L, Mann M, Jackson SP and Choudhary C. Proteomic investigations reveal a role for RNA processing factor THRAP3 in the DNA damage response. *Mol Cell* 2012; 46: 212-25.
- [16] Weber C, Schreiber TB and Daub H. Dual phosphoproteomics and chemical proteomics analysis of erlotinib and gefitinib interference in acute myeloid leukemia cells. *J Proteomics* 2012; 75: 1343-56.
- [17] Kim W, Bennett EJ, Huttlin EL, Guo A, Li J, Possemato A, Sowa ME, Rad R, Rush J, Comb MJ, Harper JW and Gygi SP. Systematic and quantitative assessment of the ubiquitin-modified proteome. *Mol Cell* 2011; 44: 325-40.
- [18] Wagner SA, Beli P, Weinert BT, Nielsen ML, Cox J, Mann M and Choudhary C. A Proteome-wide, Quantitative survey of in vivo ubiquitylation sites reveals widespread regulatory roles. *Mol Cell Proteomics* 2011; 10: M111.013284.

## Thymidylate synthase in human cancers

- [19] Kettenbach AN, Schweppe DK, Faherty BK, Pechenick D, Pletnev AA and Gerber SA. Quantitative phosphoproteomics identifies substrates and functional modules of aurora and polo-like kinase activities in mitotic cells. *Sci Signal* 2011; 4: rs5.
- [20] Iliuk AB, Martin VA, Alicie BM, Geahlen RL and Tao WA. In-depth analyses of kinase-dependent tyrosine phosphoproteomes based on metal ion-functionalized soluble nanopolymers. *Mol Cell Proteomics* 2010; 9: 2162-72.
- [21] Fraczyk T, Kubiński K, Mastyk M, Cieśła J, Hellman U, Shugar D and Rode W. Phosphorylation of thymidylate synthase from various sources by human protein kinase CK2 and its catalytic subunits. *Bioorg Chem* 2010; 38: 124-131.
- [22] Jarmuła A, Fraczyk T, Cieplak P and Rode W. Mechanism of influence of phosphorylation on serine 124 on a decrease of catalytic activity of human thymidylate synthase. *Bioorg Med Chem* 2010; 18: 3361-70.
- [23] Olsen JV, Vermeulen M, Santamaria A, Kumar C, Miller ML, Jensen LJ, Gnad F, Cox J, Jensen TS, Nigg EA, Brunak S and Mann M. Quantitative phosphoproteomics reveals widespread full phosphorylation site occupancy during mitosis. *Sci Signal* 2010; 3: ra3.
- [24] Jørgensen C, Sherman A, Chen GI, Pasculescu A, Poliakov A, Hsiung M, Larsen B, Wilkinson DG, Linding R and Pawson T. Cell-specific information processing in segregating populations of Eph receptor ephrin-expressing cells. *Science* 2009; 326: 1502-9.
- [25] Choudhary C, Olsen JV, Brandts C, Cox J, Reddy PN, Böhmer FD, Gerke V, Schmidt-Arras DE, Berdel WE, Müller-Tidow C, Mann M and Serve H. Mislocalized activation of oncogenic RTKs switches downstream signaling outcomes. *Mol Cell* 2009; 36: 326-39.
- [26] Mayya V, Lundgren DH, Hwang SI, Rezaul K, Wu L, Eng JK, Rodionov V and Han DK. Quantitative phosphoproteomic analysis of T cell receptor signaling reveals system-wide modulation of protein-protein interactions. *Sci Signal* 2009; 2: ra46.
- [27] Anderson DD, Woeller CF and Stover PJ. Small ubiquitin-like modifier-1 (SUMO-1) modification of thymidylate synthase and dihydrofolate reductase. *Clin Chem Lab Med* 2007; 45: 1760-3.
- [28] Rush J, Moritz A, Lee KA, Guo A, Goss VL, Spek EJ, Zhang H, Zha XM, Polakiewicz RD and Comb MJ. Immunoaffinity profiling of tyrosine phosphorylation in cancer cells. *Nat Biotechnol* 2005; 23: 94-101.

## Thymidylate synthase in human cancers

**Supplementary Table 1.** The detailed analysis of **Figure 1**

| Ref. No. | Year | Journal              | Summary                                                                                                                                                                                                                                                                                                                                                                                                                                                                                                                                                                                                 |
|----------|------|----------------------|---------------------------------------------------------------------------------------------------------------------------------------------------------------------------------------------------------------------------------------------------------------------------------------------------------------------------------------------------------------------------------------------------------------------------------------------------------------------------------------------------------------------------------------------------------------------------------------------------------|
| 10       | 2022 | JCI Insight          | In Men1-mutant in vivo and in vitro background, increased levels of TYMS accelerate pancreatic neuroendocrine tumor cell proliferation, disrupt cell cycle regulation, and correlate with elevated somatic mutations, DNA damage, and genomic instability.                                                                                                                                                                                                                                                                                                                                              |
| 11       | 2022 | Med Oncol            | 5-FU leads to resistance against TYMS targeting drugs. Various chemoresistance mechanisms include autophagy, apoptosis evasion, drug detoxification and altered signaling pathways containing AKT/PI3K, RAS-MAPK, WNT/ $\beta$ catenin, mTOR.                                                                                                                                                                                                                                                                                                                                                           |
| 12       | 2022 | Elife                | E7, a novel anticancer drug, inhibits TYMS expression in both pancreatic and ovarian cancer cells and hastens its proteasomal degradation, lowering enzyme levels.                                                                                                                                                                                                                                                                                                                                                                                                                                      |
| 13       | 2022 | Clin Cancer Res      | Phase I clinical trials revealed CT900, a novel TYMS inhibitor targeting $\alpha$ -folate receptor, demonstrated an acceptable side effect profile and clinical benefit in patients with ovarian cancers.                                                                                                                                                                                                                                                                                                                                                                                               |
| 14       | 2019 | Cell Death Differ    | In vitro, knockdown of TYMS attenuated migration and sphere formation while repressing the expression of epithelial-mesenchymal transition (EMT) signature genes. In vivo, cells deficient in TYMS demonstrated an increased ability to invade and metastasize. Mechanistically, TYMS enzymatic activity was found to be essential for maintaining the EMT/stem-like state by facilitating dihydropyrimidine dehydrogenase-dependent pyrimidine catabolism.                                                                                                                                             |
| 15       | 2016 | Clin Cancer Res      | Id1 was found to confer 5-FU chemoresistance through E2F1-dependent induction of TYMS expression in esophageal cancer. Additionally, an intricate E2F1-dependent mechanism was elucidated, whereby Id1 increases TYMS and IGF2 expressions to promote cancer chemoresistance.                                                                                                                                                                                                                                                                                                                           |
| 16       | 2007 | Clin Cancer Res      | In NSCLC patients, E2F1 gene expression correlates with TS gene expressions and tumor proliferation.                                                                                                                                                                                                                                                                                                                                                                                                                                                                                                    |
| 17       | 2004 | Clin Cancer Res      | The induction of TYMS expression inhibits Fas induction in response to raltitrexed and Alimta, leading to the inactivation of Caspase-8.                                                                                                                                                                                                                                                                                                                                                                                                                                                                |
| 18       | 2004 | Cancer Cell          | Overexpression of TYMS results in programmed cell death following serum removal. The ectopic expression of TYMS is sufficient to induce a transformed phenotype in mammalian cells, as evidenced by foci formation, anchorage-independent growth, and tumor formation in nude mice.                                                                                                                                                                                                                                                                                                                     |
| 19       | 2022 | Mol Med              | The MALAT1 lncRNA and miRNA (miR-197-3p, miR-203a-3p, miR-375-3p) network regulates TYMS expression and predicts chemoresistance to 5-FU treatment.                                                                                                                                                                                                                                                                                                                                                                                                                                                     |
| 20       | 2022 | Biomedicines         | TYMS is involved in the modulation of epithelial-mesenchymal transition (EMT) and colorectal cancer metastasis. Silencing TYMS expression reverses EMT and inhibits the invasive capacity of cancer cells.                                                                                                                                                                                                                                                                                                                                                                                              |
| 21       | 2014 | Oncotarget           | HSP90 knockdown inhibits cell cycle progression, downregulates TYMS levels, and sensitizes colorectal cancer cell lines to the effects of 5-FU.                                                                                                                                                                                                                                                                                                                                                                                                                                                         |
| 22       | 2012 | Aging                | Simultaneous genetic inhibition of TYMS and ribonucleotide reductase in melanoma cells induces DNA damage and senescence phenotypes. Conversely, overexpression of TYMS and ribonucleotide reductase inhibits DNA damage and senescence-associated phenotypes caused by C-myc depletion.                                                                                                                                                                                                                                                                                                                |
| 23       | 2009 | Int J Cancer         | Histone deacetylase inhibitors (HDACi) significantly downregulate TYMS gene expression in colon cancer cell lines. This downregulation is independent of p53, p21, and HDAC2 expression and can be achieved in vivo, thereby contributing to overcoming chemoresistance to 5-FU.                                                                                                                                                                                                                                                                                                                        |
| 24       | 2019 | Carcino-genesis      | Melatonin-mediated downregulation of thymidylate synthase as a novel mechanism for overcoming 5-fluorouracil associated chemoresistance in colorectal cancer cells.                                                                                                                                                                                                                                                                                                                                                                                                                                     |
| 25       | 2020 | J Adv Res            | A novel TYMS inhibitor induces apoptosis through the mitochondrial pathway in NSCLC cells by upregulating wild-type p53 protein expression. This compound also inhibits angiogenesis both in vitro and in vivo.                                                                                                                                                                                                                                                                                                                                                                                         |
| 26       | 2011 | J Pharmacol Exp Ther | Cisplatin increases the phosphorylation of mitogen-activated protein kinase kinase 1/2 (MKK1/2) and extracellular signal-regulated kinase 1/2 (ERK1/2), as well as the protein levels of TYMS, by enhancing protein stability in NSCLC cells. Depletion of endogenous TYMS expression significantly increases cisplatin-induced cell death and growth inhibition. Enforced expression of constitutively active MKK1/2 vectors rescues the protein levels of phospho-ERK1/2 and TYMS. In conclusion, the upregulation of ERK1/2-dependent TYMS protects NSCLC cells from cisplatin-induced cytotoxicity. |

# Thymidylate synthase in human cancers

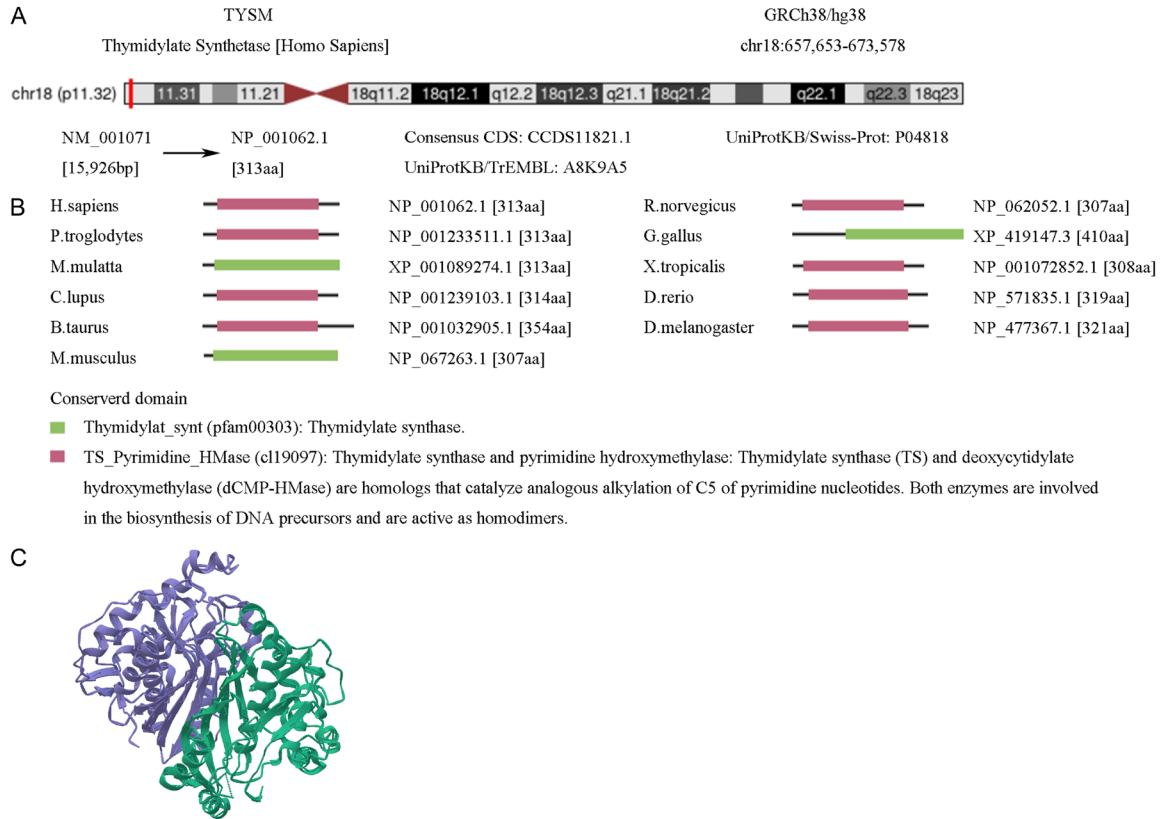

**Supplementary Figure 1.** Structural characteristics of TYMS. A. Gene location of TYMS. B. Conserved domain of TYMS. C. Three-dimension structure of TYMS.

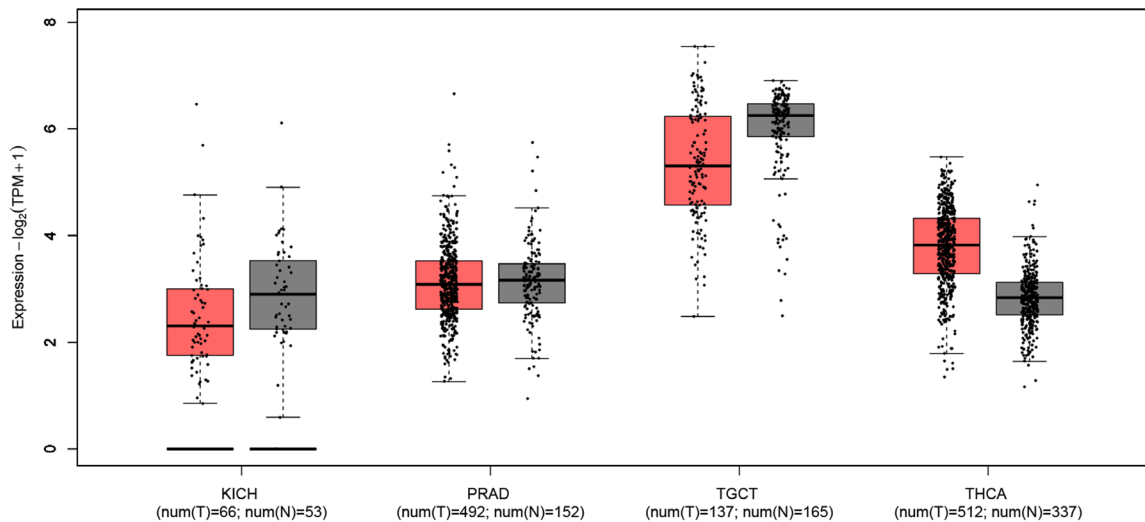

**Supplementary Figure 2.** TYMS expression showed no difference between KICH, PRAD, TGCT, or THCA and their comparable normal tissues. KICH, kidney chromophobe; PRAD, prostatic adenocarcinoma; TGCT, testicular germ cell tumors; THCA, thyroid carcinoma.

# Thymidylate synthase in human cancers

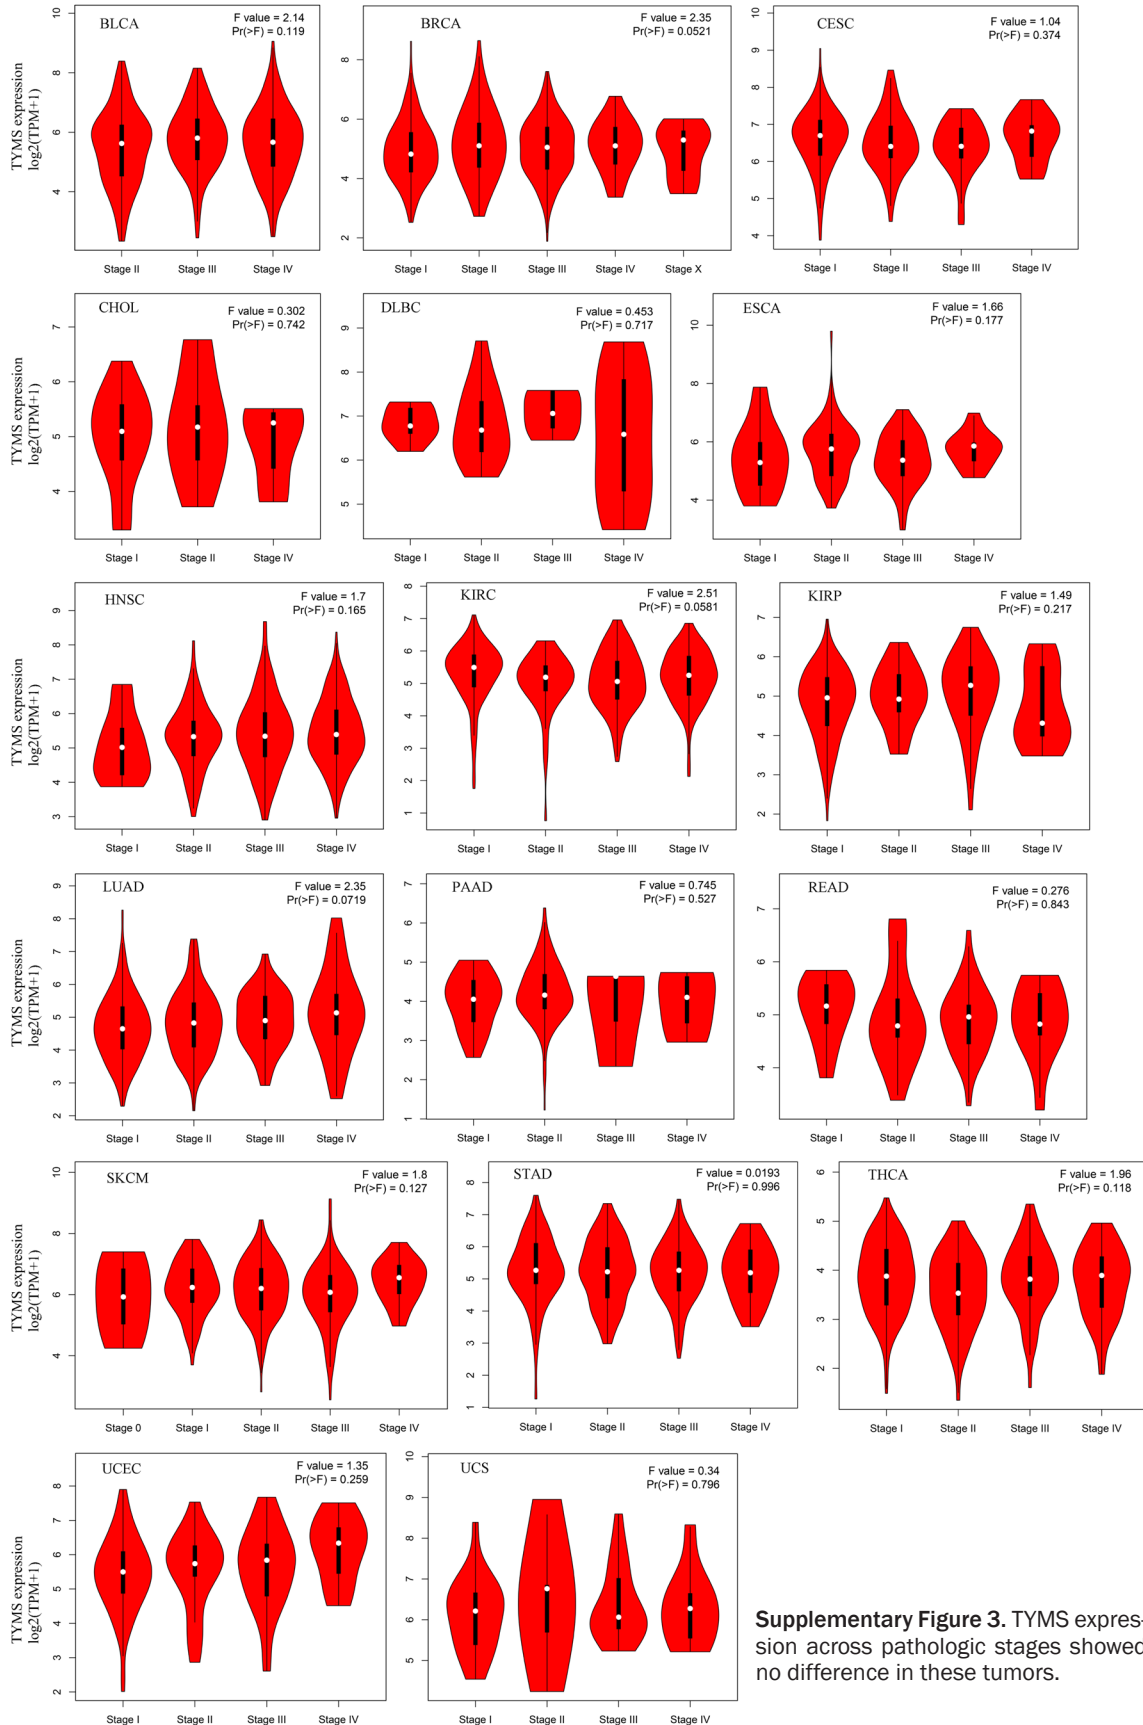

**Supplementary Figure 3.** TYMS expression across pathologic stages showed no difference in these tumors.

# Thymidylate synthase in human cancers

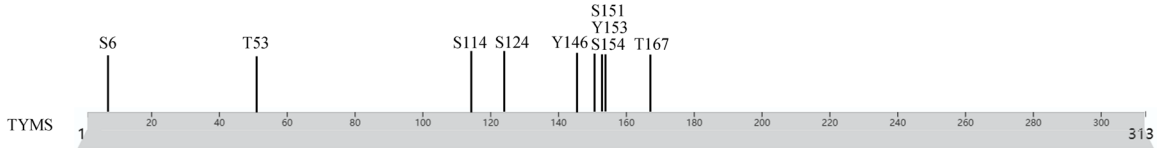

Supplementary Figure 4. Phosphoprotein site of TYMS showed in the axis.

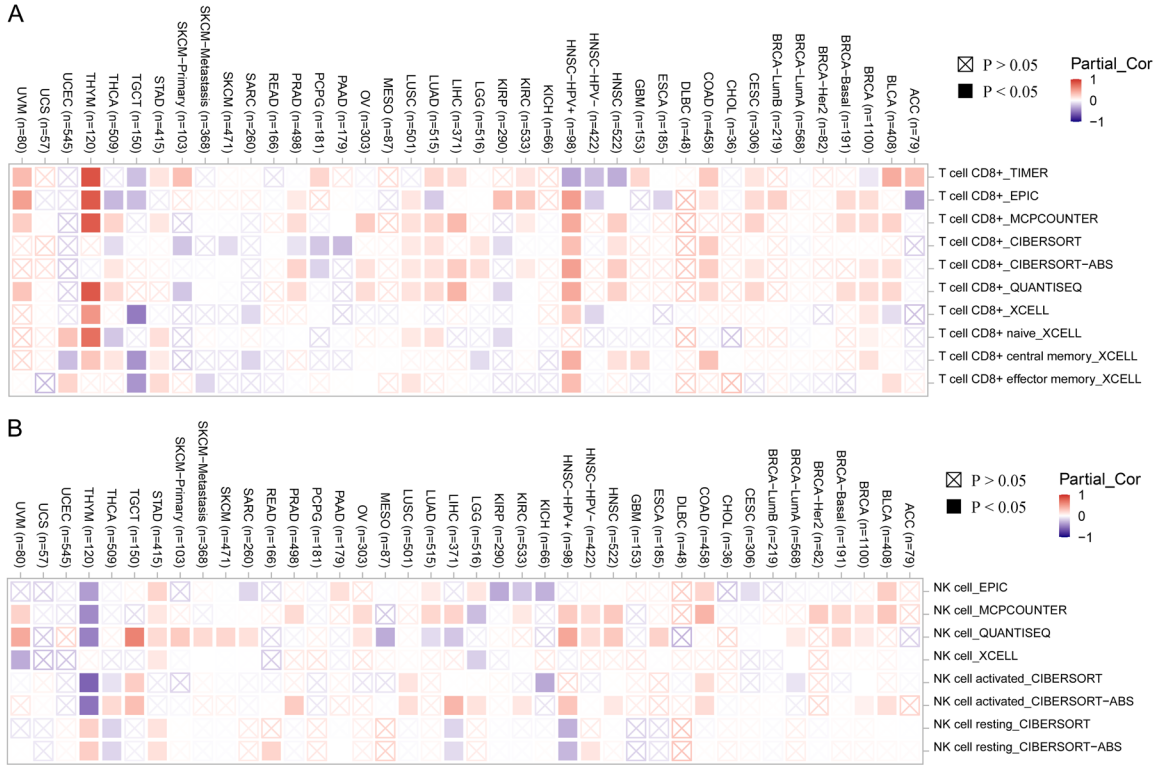

Supplementary Figure 5. Correlation between TYMS and CD8+ immune cells (A) and NK cells (B). NK, natural killer.

## Thymidylate synthase in human cancers

**Supplementary Table 2.** Top 100 TYMS-correlated genes

| Gene Symbol | Gene ID            | Pearson correlation coefficient |
|-------------|--------------------|---------------------------------|
| NDC80       | ENSG00000080986.12 | 0.73                            |
| EZH2        | ENSG00000106462.10 | 0.66                            |
| NUSAP1      | ENSG00000137804.12 | 0.66                            |
| WDR76       | ENSG00000092470.11 | 0.65                            |
| MCM6        | ENSG00000076003.4  | 0.65                            |
| KIFC1       | ENSG00000237649.7  | 0.65                            |
| NCAPG       | ENSG00000109805.9  | 0.64                            |
| KIF15       | ENSG00000163808.16 | 0.64                            |
| LMNB1       | ENSG00000113368.11 | 0.63                            |
| HMGB2       | ENSG00000164104.11 | 0.63                            |
| FEN1        | ENSG00000168496.3  | 0.63                            |
| PCNA        | ENSG00000132646.10 | 0.63                            |
| GTSE1       | ENSG00000075218.18 | 0.62                            |
| KIF2C       | ENSG00000142945.12 | 0.62                            |
| MCM3        | ENSG00000112118.17 | 0.61                            |
| PLK4        | ENSG00000142731.10 | 0.61                            |
| CHAF1A      | ENSG00000167670.15 | 0.61                            |
| CDC7        | ENSG00000097046.12 | 0.61                            |
| CLSPN       | ENSG00000092853.13 | 0.61                            |
| KIAA0101    | ENSG00000166803.10 | 0.6                             |
| AURKB       | ENSG00000178999.12 | 0.6                             |
| FANCI       | ENSG00000140525.17 | 0.6                             |
| UHRF1       | ENSG00000276043.4  | 0.6                             |
| FBX05       | ENSG00000112029.9  | 0.6                             |
| H2AFZ       | ENSG00000164032.11 | 0.59                            |
| CENPU       | ENSG00000151725.11 | 0.59                            |
| RAD54L      | ENSG00000085999.11 | 0.59                            |
| NCAPG2      | ENSG00000146918.19 | 0.59                            |
| DNMT1       | ENSG00000130816.14 | 0.59                            |
| STMN1       | ENSG00000117632.20 | 0.59                            |
| TMPO        | ENSG00000120802.13 | 0.58                            |
| KIF4A       | ENSG00000090889.11 | 0.58                            |
| PRC1        | ENSG00000198901.13 | 0.58                            |
| NCAPH       | ENSG00000121152.9  | 0.58                            |
| CENPK       | ENSG00000123219.12 | 0.58                            |
| HMGN2       | ENSG00000198830.10 | 0.58                            |
| ASPM        | ENSG00000066279.16 | 0.58                            |
| KIF18B      | ENSG00000186185.13 | 0.58                            |
| KIF11       | ENSG00000138160.5  | 0.57                            |
| CHAF1B      | ENSG00000159259.7  | 0.57                            |
| SKA1        | ENSG00000154839.9  | 0.57                            |
| TCF19       | ENSG00000137310.11 | 0.57                            |
| DONSON      | ENSG00000159147.17 | 0.57                            |
| BUB1        | ENSG00000169679.14 | 0.57                            |
| CCNB2       | ENSG00000157456.7  | 0.57                            |
| CHEK1       | ENSG00000149554.12 | 0.57                            |
| MCM2        | ENSG00000073111.13 | 0.57                            |
| PSMC3IP     | ENSG00000131470.14 | 0.57                            |
| SGOL2       | ENSG00000163535.17 | 0.57                            |

## Thymidylate synthase in human cancers

|          |                    |      |
|----------|--------------------|------|
| KIF23    | ENSG00000137807.13 | 0.57 |
| MCM5     | ENSG00000100297.15 | 0.56 |
| E2F1     | ENSG00000101412.12 | 0.56 |
| CDC45    | ENSG00000093009.9  | 0.56 |
| ASF1B    | ENSG00000105011.8  | 0.56 |
| CENPF    | ENSG00000117724.12 | 0.56 |
| CDCA5    | ENSG00000146670.9  | 0.56 |
| TUBA1B   | ENSG00000123416.15 | 0.56 |
| NUF2     | ENSG00000143228.12 | 0.56 |
| CDC25C   | ENSG00000158402.18 | 0.56 |
| CCNA2    | ENSG00000145386.9  | 0.56 |
| BRIP1    | ENSG00000136492.8  | 0.56 |
| MND1     | ENSG00000121211.7  | 0.56 |
| LRR1     | ENSG00000165501.16 | 0.56 |
| ZWINT    | ENSG00000122952.16 | 0.56 |
| TUBB     | ENSG00000196230.12 | 0.55 |
| CENPO    | ENSG00000138092.10 | 0.55 |
| SPC25    | ENSG00000152253.8  | 0.55 |
| POLA2    | ENSG00000014138.8  | 0.55 |
| H2AFV    | ENSG00000105968.18 | 0.55 |
| TPX2     | ENSG00000088325.15 | 0.55 |
| E2F2     | ENSG00000007968.6  | 0.55 |
| BIRC5    | ENSG00000089685.14 | 0.55 |
| SGOL1    | ENSG00000129810.14 | 0.55 |
| RFC2     | ENSG00000049541.10 | 0.55 |
| EXO1     | ENSG00000174371.16 | 0.55 |
| NEIL3    | ENSG00000109674.3  | 0.55 |
| EXOSC9   | ENSG00000123737.12 | 0.55 |
| PHF19    | ENSG00000119403.13 | 0.55 |
| FBXO43   | ENSG00000156509.13 | 0.55 |
| DLGAP5   | ENSG00000126787.12 | 0.55 |
| ZNF367   | ENSG00000165244.6  | 0.55 |
| KIF20A   | ENSG00000112984.11 | 0.54 |
| MXD3     | ENSG00000213347.10 | 0.54 |
| TIMELESS | ENSG00000111602.11 | 0.54 |
| MAD2L1   | ENSG00000164109.13 | 0.54 |
| PRIM1    | ENSG00000198056.13 | 0.54 |
| CDT1     | ENSG00000167513.8  | 0.54 |
| UBE2T    | ENSG00000077152.9  | 0.54 |
| HJURP    | ENSG00000123485.11 | 0.54 |
| CKAP2L   | ENSG00000169607.12 | 0.54 |
| FAM64A   | ENSG00000129195.15 | 0.54 |
| FAM72B   | ENSG00000188610.12 | 0.54 |
| RNASEH2A | ENSG00000104889.4  | 0.54 |
| GINS1    | ENSG00000101003.9  | 0.54 |
| METTL4   | ENSG00000101574.14 | 0.53 |
| NASP     | ENSG00000132780.16 | 0.53 |
| DTL      | ENSG00000143476.17 | 0.53 |
| RFC5     | ENSG00000111445.13 | 0.53 |
| TMPO-AS1 | ENSG00000257167.2  | 0.53 |
| DSN1     | ENSG00000149636.15 | 0.53 |
